# Supplementary material for: A FASN-TGF-β1-FASN regulatory loop contributes to high EMT/metastatic potential of cisplatin-resistant non-small cell lung cancer
Source: PubMed Central journal article supplement (PMC5342435; doi:10.18632/oncotarget.10837), 2016-07-25
Supplement: oncotarget-07-55543-s001.pdf [file oncotarget-07-55543-s001.pdf]

# A FASN-TGF- $\beta$ 1-FASN regulatory loop contributes to high EMT/metastatic potential of cisplatin-resistant non-small cell lung cancer

## SUPPLEMENTARY FIGURE

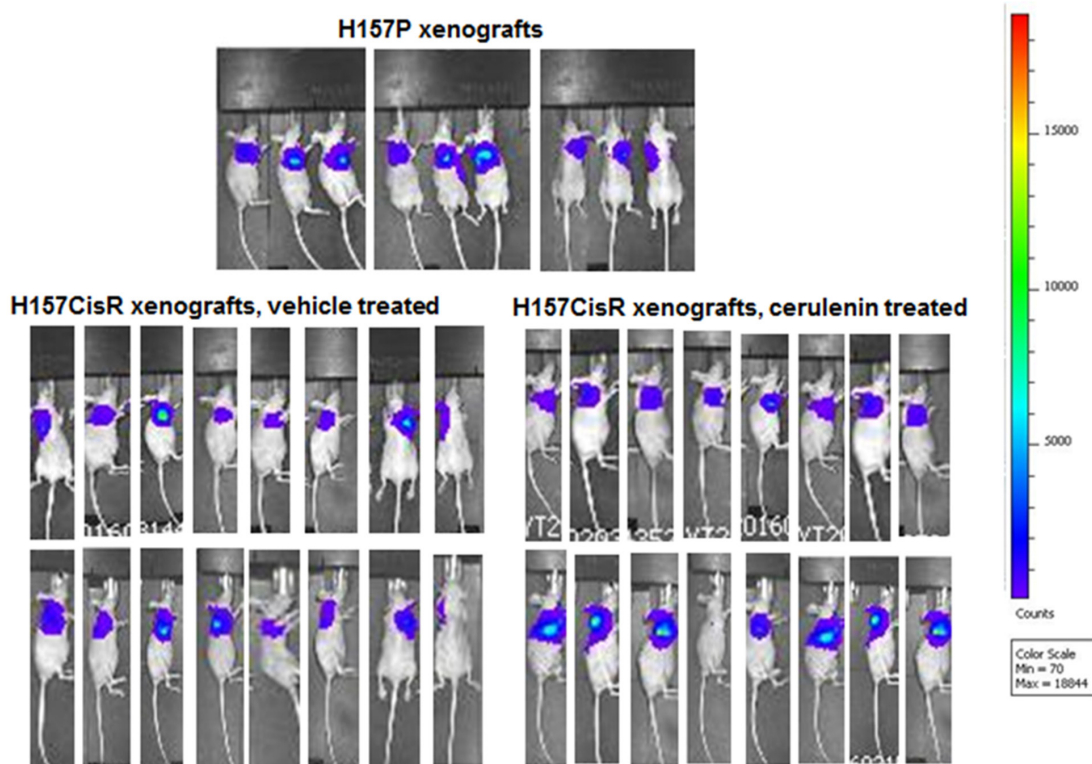

Supplementary Figure S1: IVIS image of mice bearing H157P cell-derived and H157CisR cell-derived (treated with either vehicle or cerulenin) tumors at 3 weeks of treatment.
